# Supplementary material
Source: PubMed Central journal article supplement (PMC2222964)

Supplementary Figure 1 Kittappa et al.

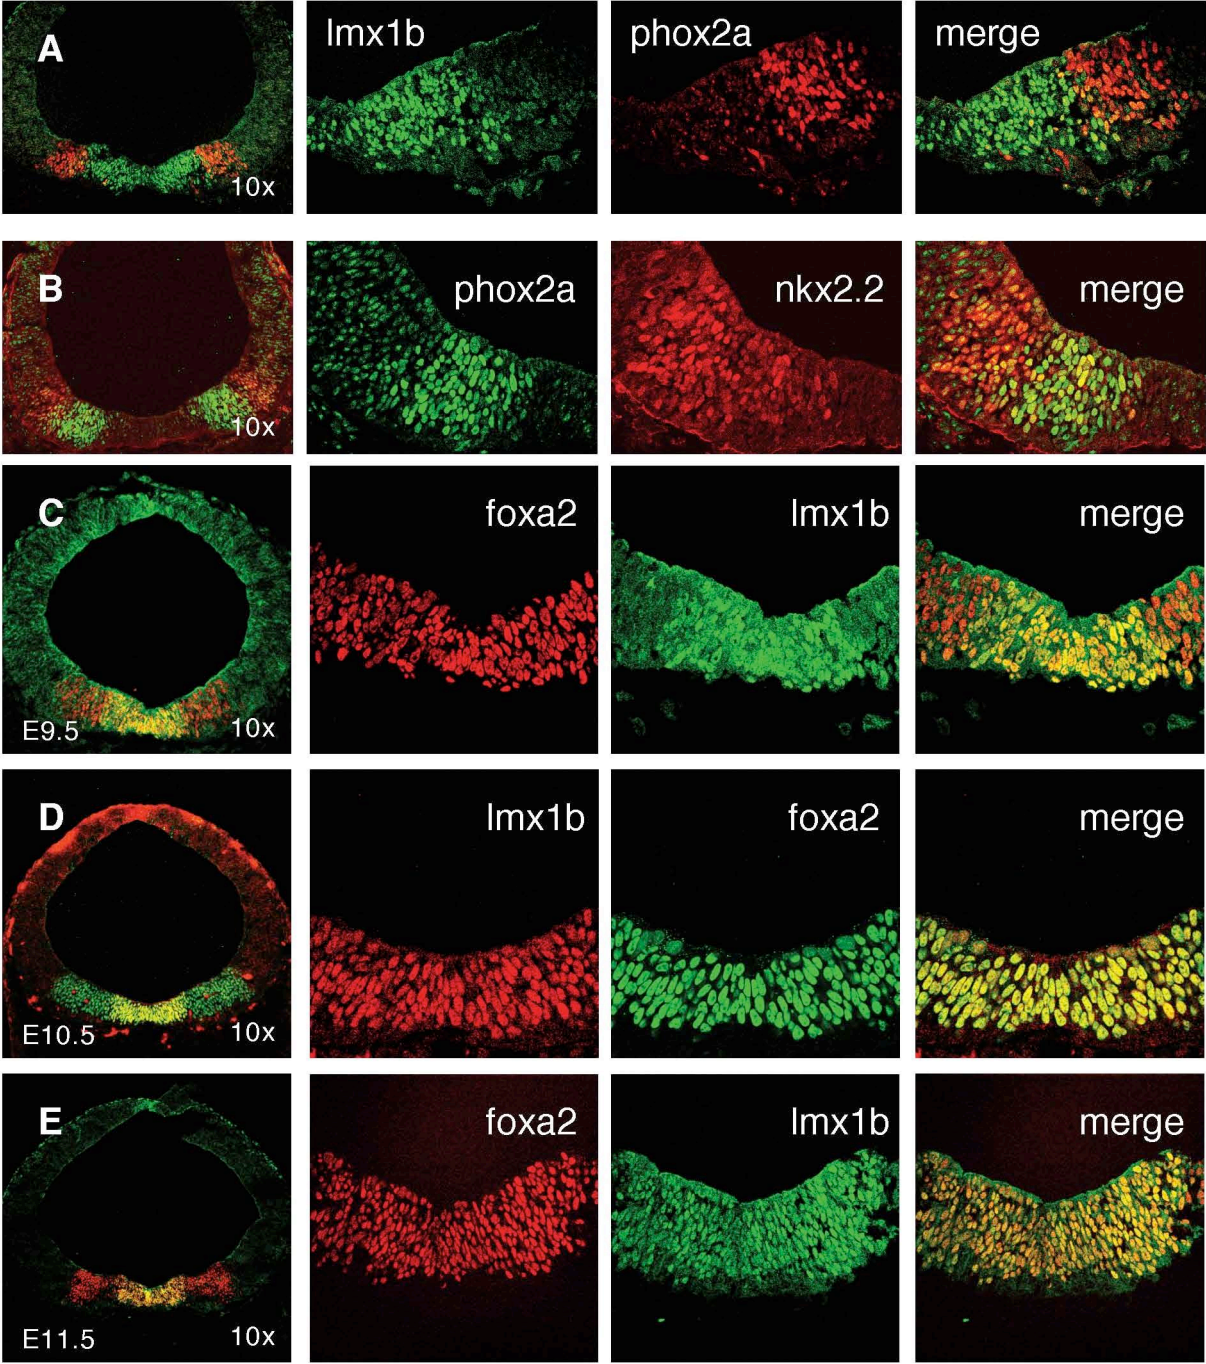

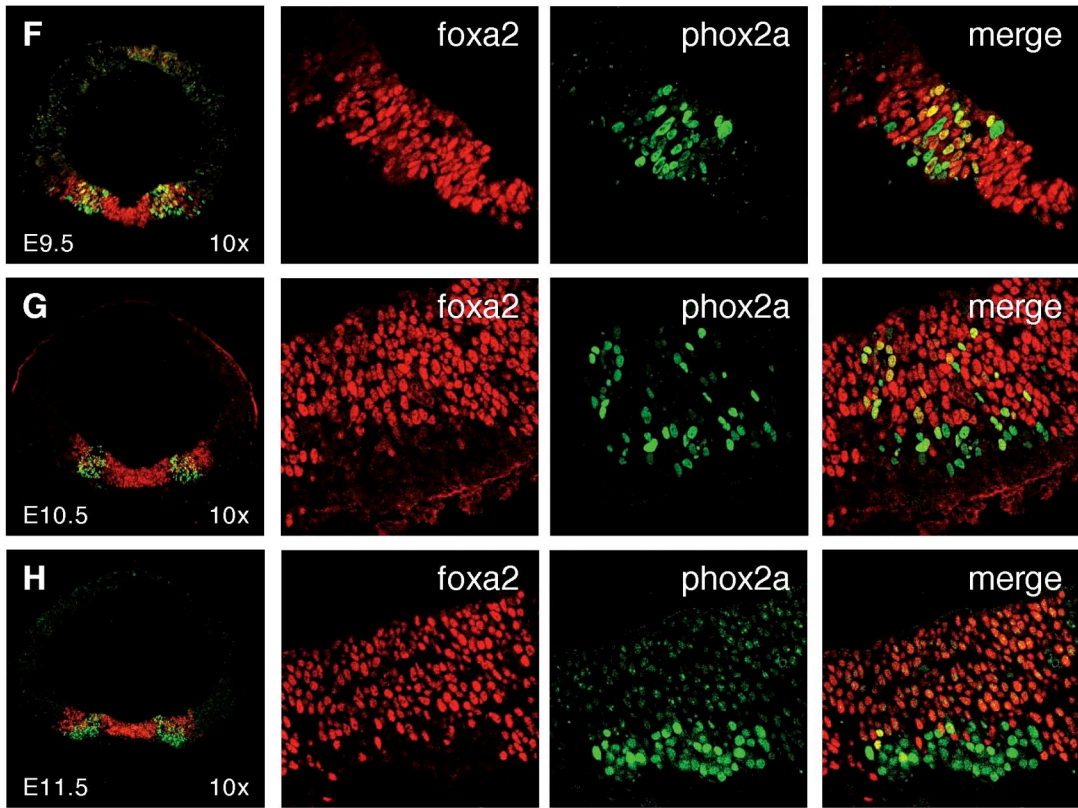

Supplement: pbio.0050325.sg001.pdf [file pbio.0050325.sg001.pdf]

Supplementary Figure 2 Kittappa et al.

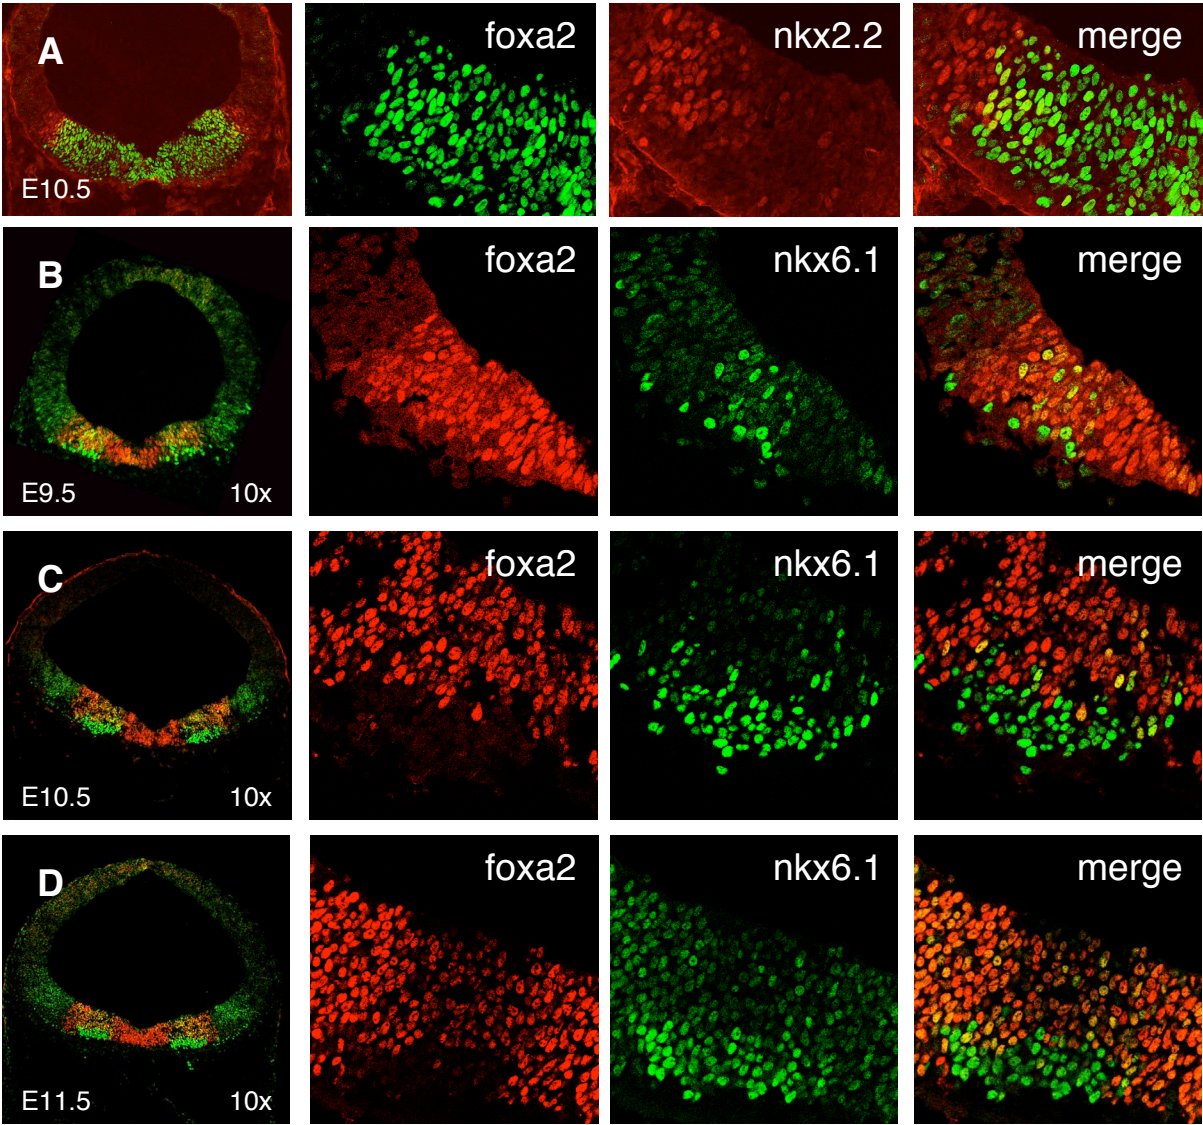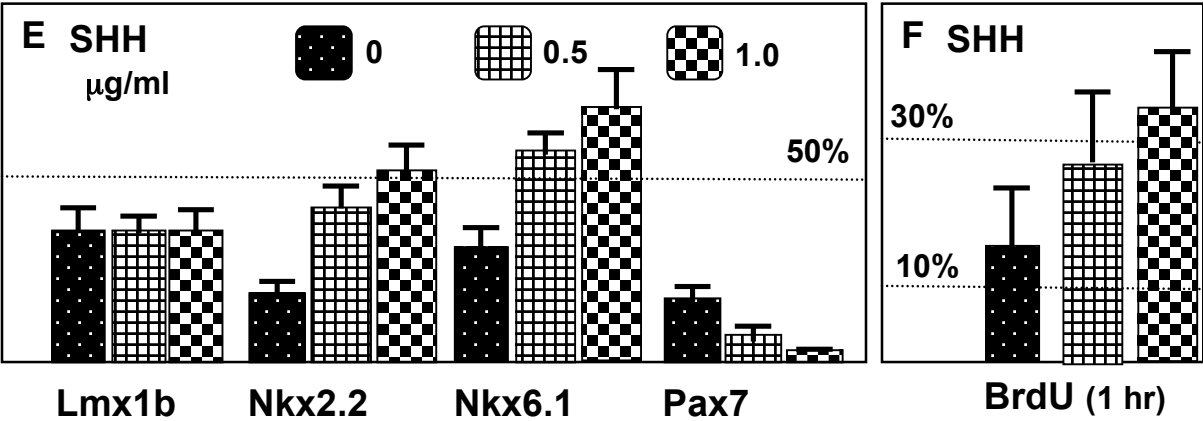

Supplement: pbio.0050325.sg002.pdf [file pbio.0050325.sg002.pdf]

Supplementary Figure 3 Kittappa et al.

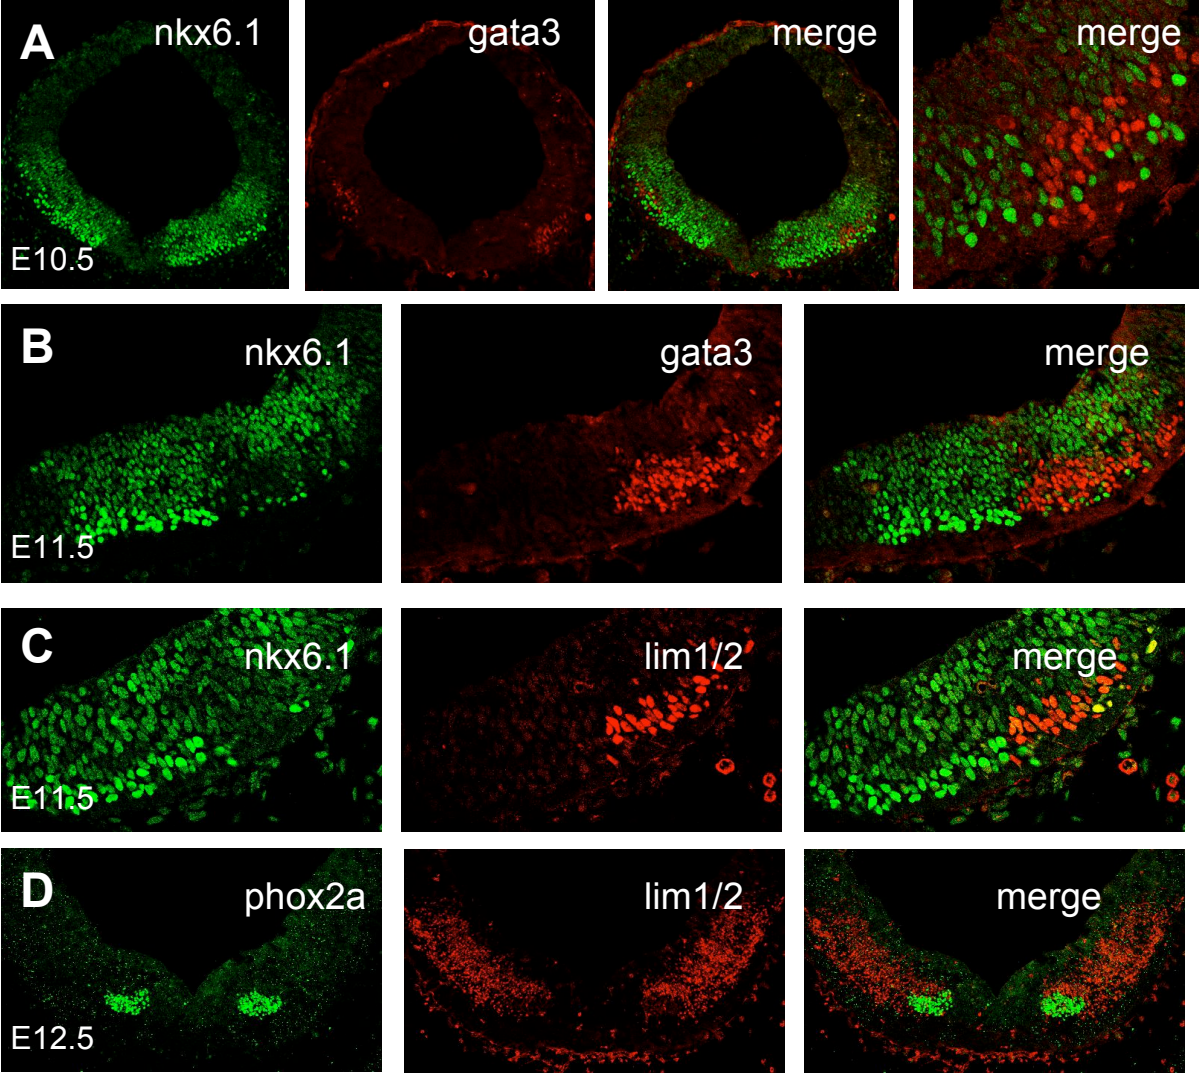

Supplement: pbio.0050325.sg003.pdf [file pbio.0050325.sg003.pdf]

Supp. Figure 4 Kittappa et al..

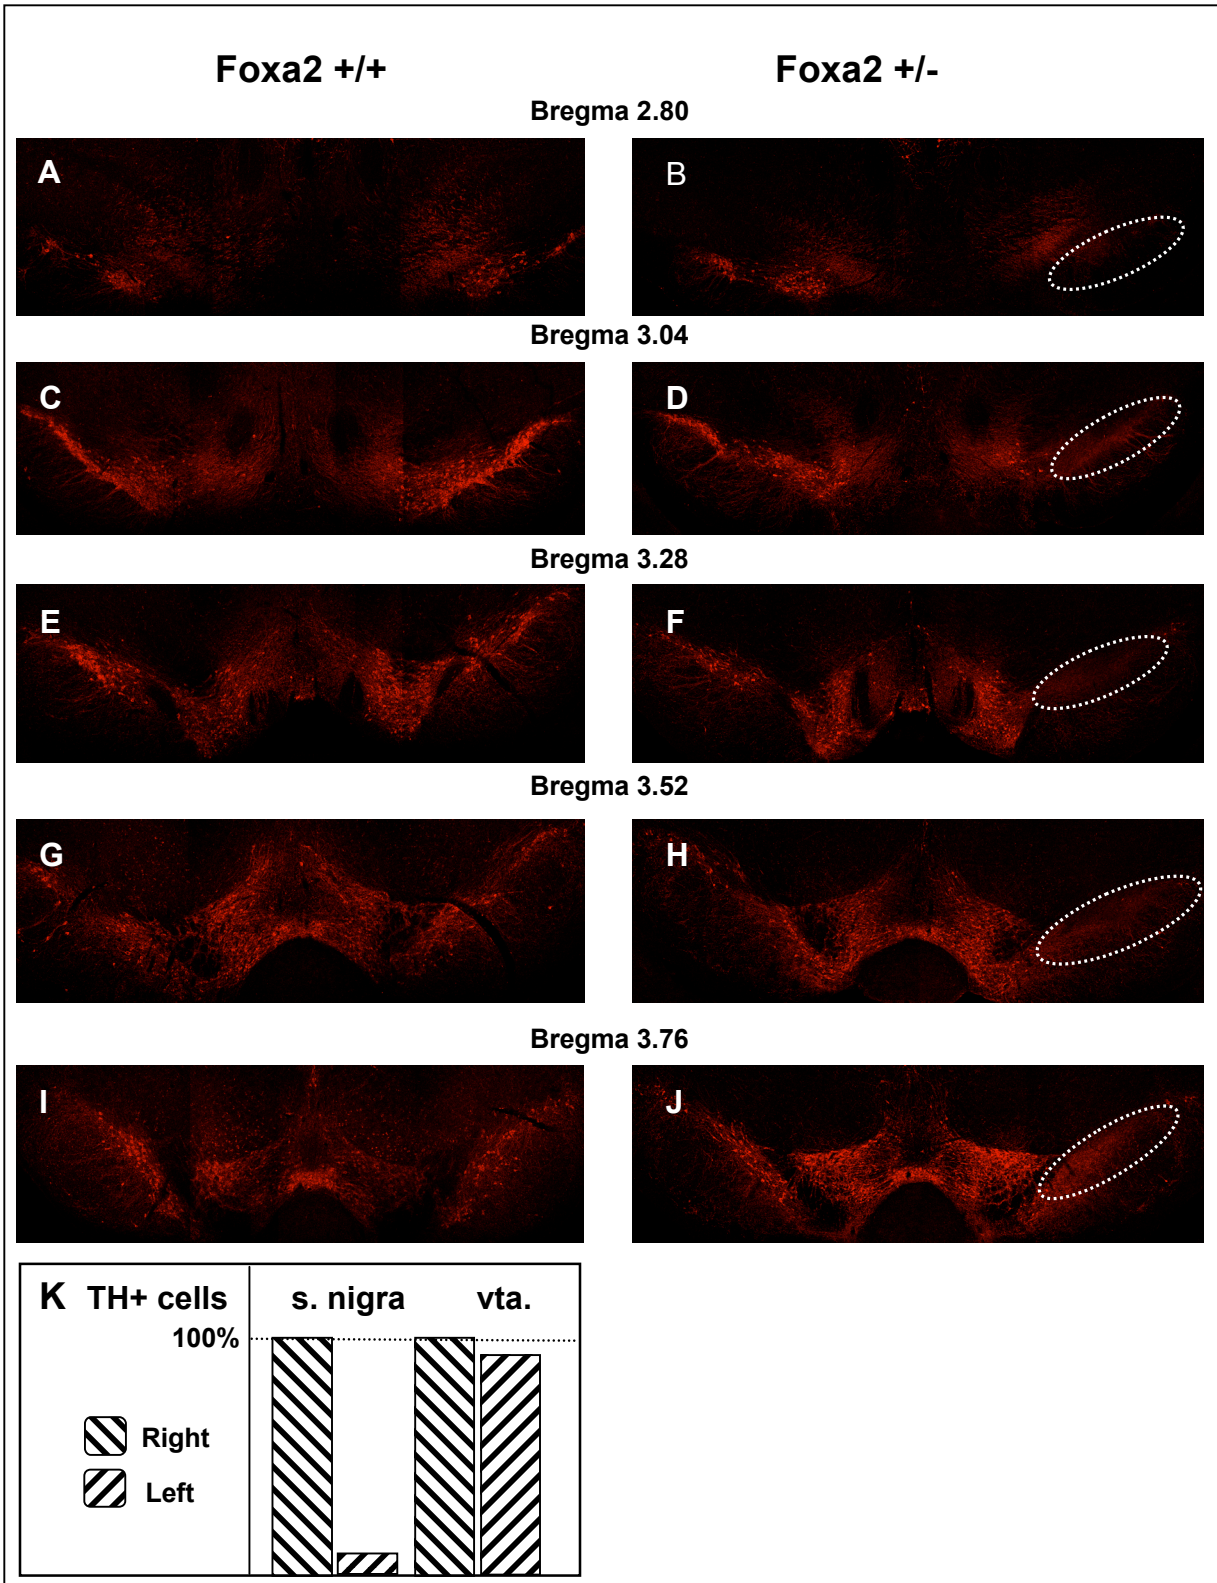

Supplement: pbio.0050325.sg004.pdf [file pbio.0050325.sg004.pdf]

Supp. Figure 5 Kittappa et al.

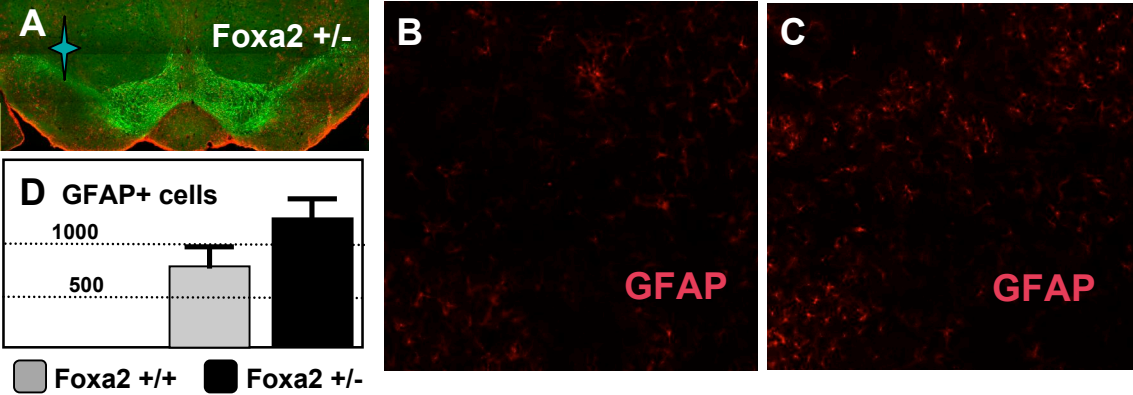

Supplement: pbio.0050325.sg005.pdf [file pbio.0050325.sg005.pdf]
